# Supplementary material for: Determining Relative Dynamic Stability of Cell States Using Boolean Network Model
Source: PubMed Central journal article supplement (PMC6089891; doi:10.1038/s41598-018-30544-0), 2018-08-13
Supplement: 41598_2018_30544_MOESM1_ESM.pdf [file 41598_2018_30544_MOESM1_ESM.pdf]

## Supplementary Information

### Determining Relative Dynamic Stability of Cell States Using Boolean Network Model

**Jae Il Joo<sup>1§</sup>, Joseph X. Zhou<sup>2,3§</sup>, Sui Huang<sup>2\*</sup>, Kwang-Hyun Cho<sup>1\*</sup>,**

<sup>1</sup> Department of Bio and Brain Engineering, Korea Advanced Institute of Science and Technology (KAIST), Daejeon 34141, Republic of Korea

<sup>2</sup> Institute for Systems Biology, Seattle, WA, USA

<sup>3</sup> Kavli Institute for Theoretical Physics, UC Santa Barbara, California, USA

§ These authors contributed equally as first author

\*Authors for correspondence (KHC: [ckh@kaist.ac.kr](mailto:ckh@kaist.ac.kr); SH: [shuang@systemsbiology.org](mailto:shuang@systemsbiology.org))

**Supplementary Table S1. Derived logic tables for Boolean network model for EMT.**

$$Snail(t+1) = Input(t) \text{ AND NOT } (Snail(t) \text{ AND } \mu34(t))$$

| <b>Input(t)</b> | <b>Snail(t)</b> | <b><math>\mu34(t)</math></b> | <b>Snail(t+1)</b> |
|-----------------|-----------------|------------------------------|-------------------|
| 0               | 0               | 0                            | <b>0</b>          |
| 0               | 0               | 1                            | <b>0</b>          |
| 0               | 1               | 0                            | <b>0</b>          |
| 0               | 1               | 1                            | <b>0</b>          |
| 1               | 0               | 0                            | <b>1</b>          |
| 1               | 0               | 1                            | <b>1</b>          |
| 1               | 1               | 0                            | <b>1</b>          |
| 1               | 1               | 1                            | <b>0</b>          |

$$\mu34(t+1) = \text{NOT } Snail(t) \text{ AND NOT } Zeb(t)$$

| <b>Snail(t)</b> | <b>Zeb(t)</b> | <b><math>\mu34(t+1)</math></b> |
|-----------------|---------------|--------------------------------|
| 0               | 0             | <b>1</b>                       |
| 0               | 1             | <b>0</b>                       |
| 1               | 0             | <b>0</b>                       |
| 1               | 1             | <b>0</b>                       |

$$Zeb(t+1) = \text{NOT } \mu200(t) \text{ OR } (Snail(t) \text{ AND } Zeb(t))$$

| <b>Snail(t)</b> | <b>Zeb(t)</b> | <b><math>\mu200(t)</math></b> | <b>Zeb(t+1)</b> |
|-----------------|---------------|-------------------------------|-----------------|
| 0               | 0             | 0                             | <b>1</b>        |
| 0               | 0             | 1                             | <b>0</b>        |
| 0               | 1             | 0                             | <b>1</b>        |
| 0               | 1             | 1                             | <b>0</b>        |
| 1               | 0             | 0                             | <b>1</b>        |
| 1               | 0             | 1                             | <b>0</b>        |
| 1               | 1             | 0                             | <b>1</b>        |
| 1               | 1             | 1                             | <b>1</b>        |

$$\mu200(t+1) = \text{NOT } Snail(t) \text{ OR } (Zeb(t) \text{ AND } \mu200(t))$$

| <b>Snail(t)</b> | <b>Zeb(t)</b> | <b><math>\mu200(t)</math></b> | <b><math>\mu200(t+1)</math></b> |
|-----------------|---------------|-------------------------------|---------------------------------|
| 0               | 0             | 0                             | <b>1</b>                        |
| 0               | 0             | 1                             | <b>1</b>                        |
| 0               | 1             | 0                             | <b>1</b>                        |
| 0               | 1             | 1                             | <b>1</b>                        |
| 1               | 0             | 0                             | <b>0</b>                        |
| 1               | 0             | 1                             | <b>0</b>                        |
| 1               | 1             | 0                             | <b>0</b>                        |
| 1               | 1             | 1                             | <b>1</b>                        |

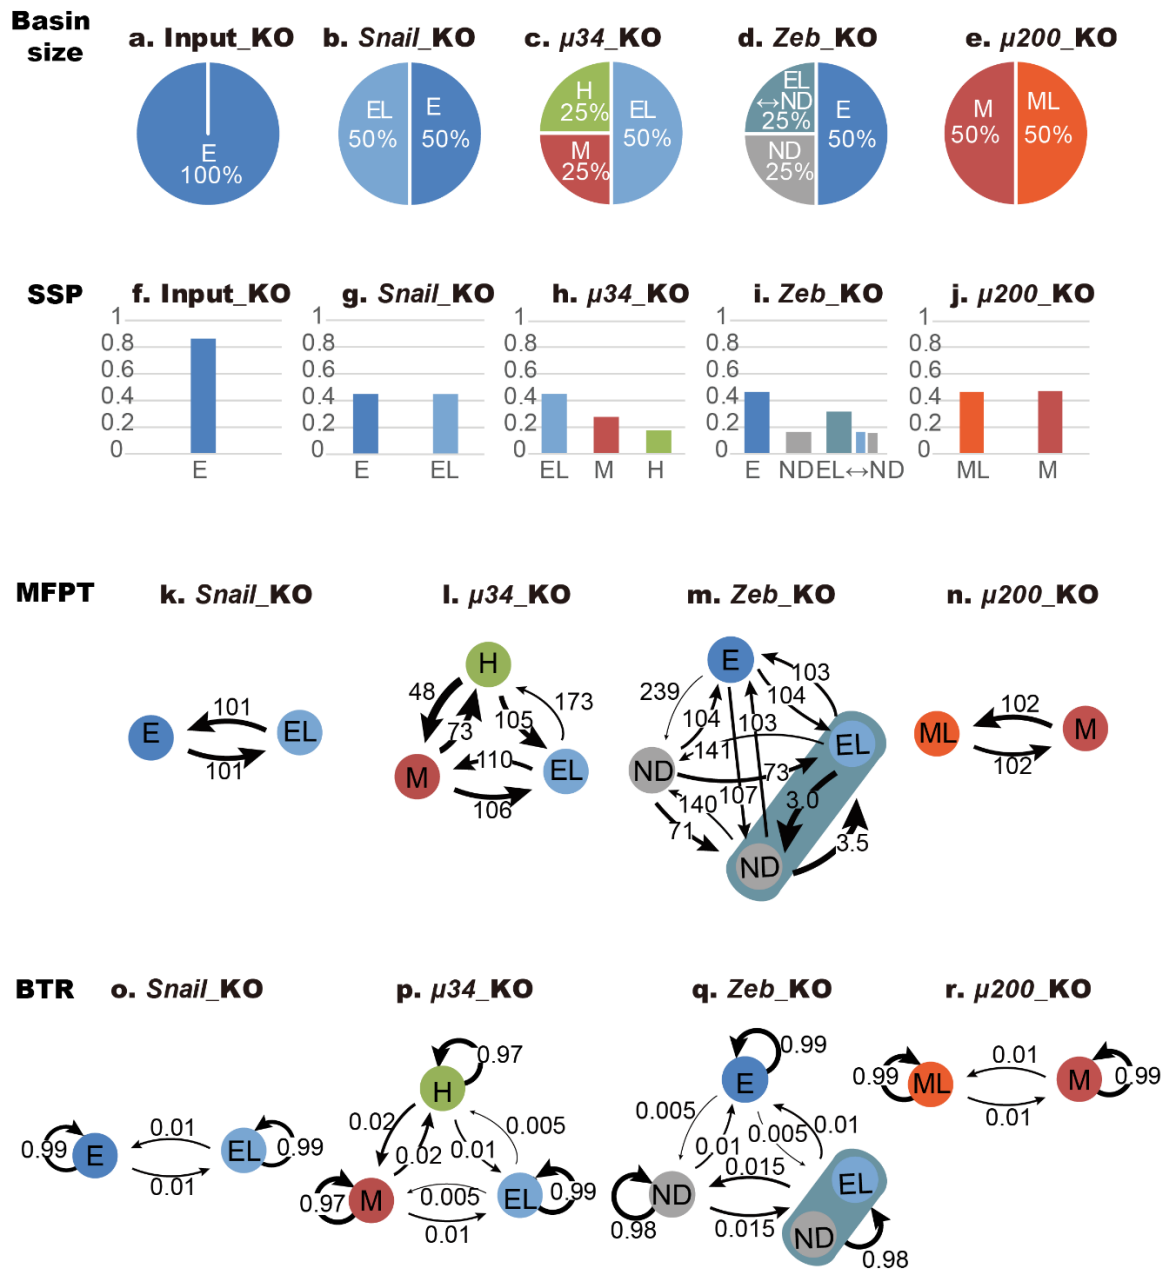

Supplementary Figure S1. **The relative dynamic stabilities of attractors in EMT Boolean model with single KO mutation.**

(a-e) The attracting basin size ratio of three attractors for each single gene knock-out. (f-j) The steady state probability distribution of three attractors for each single gene knock-out. For cyclic attractors, narrow bars represent steady state probability distribution of each state consisting the cyclic attractor and thick bar represent summed probability of them. (k-n) The mean first passage time between three attractors for each single gene knock-out. (o-r) The basin transition rates between three attractors for each single gene knock-out. States of cyclic attractor are grouped within the same color block. Note that we cannot analyze MFPT and BTR of the “Input node knock-out” case because the case had only one cell attractor.

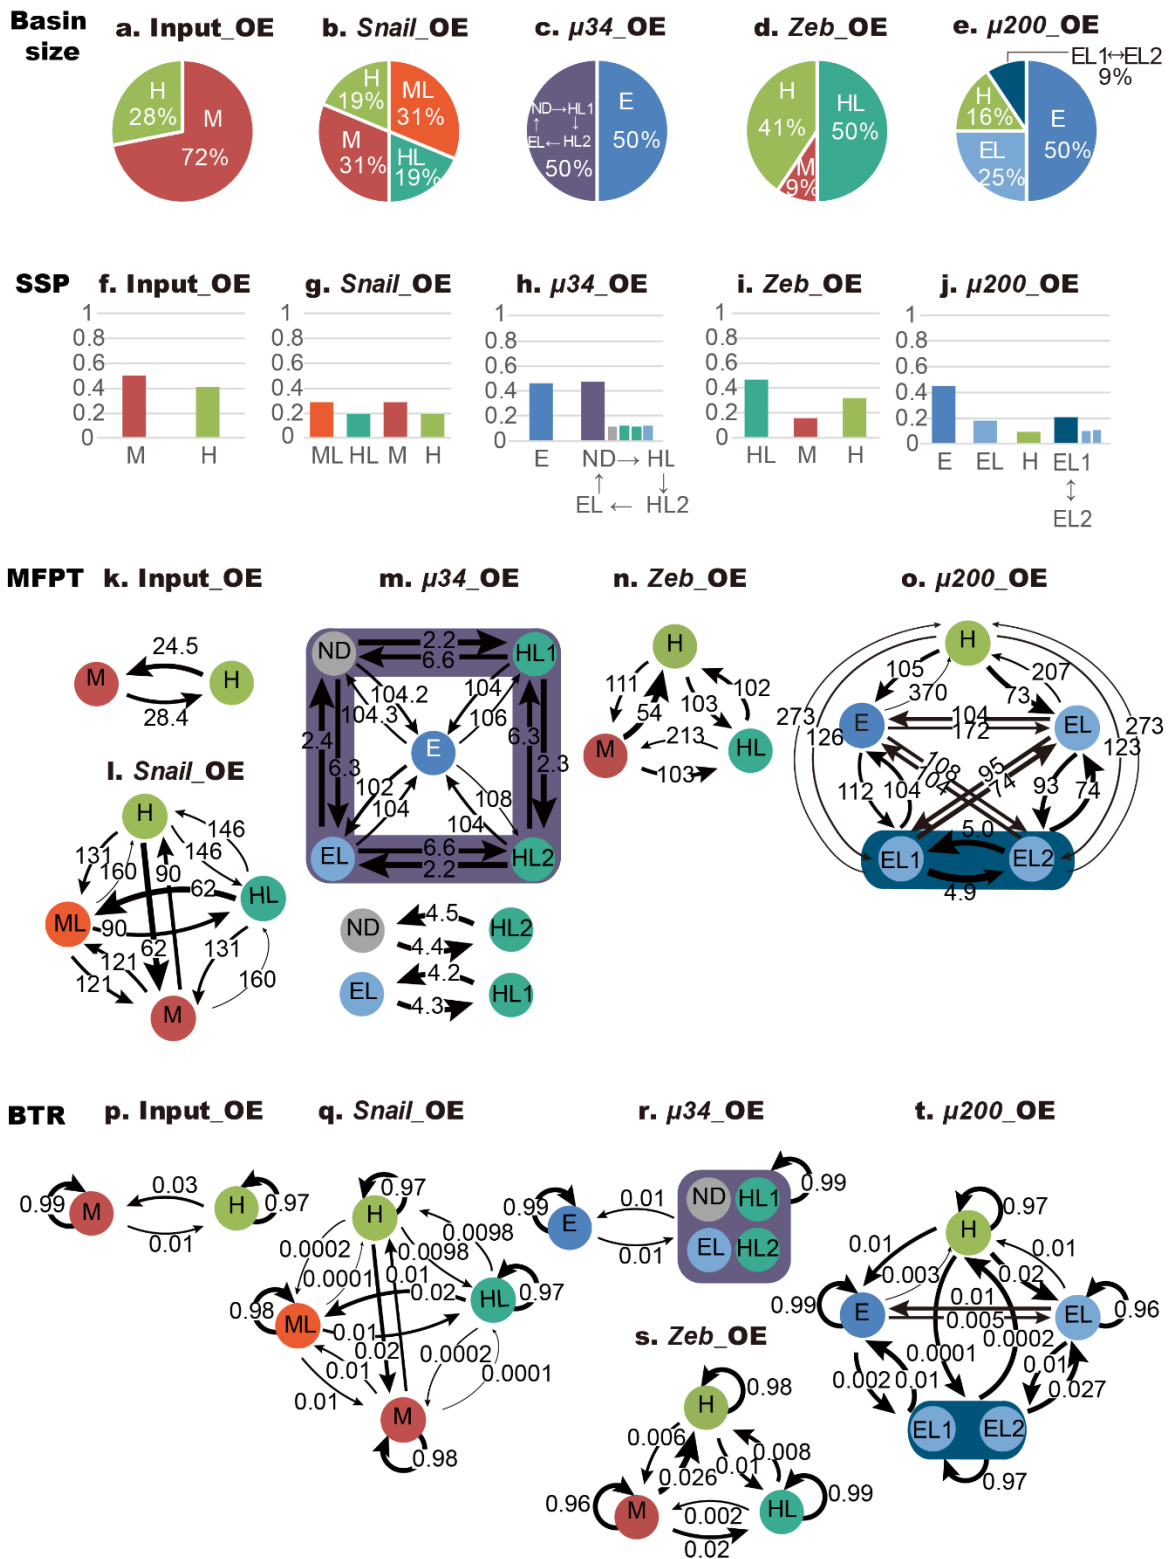

Supplementary Figure S2. **The dynamic stability of EMT Boolean model with a single gene over-expression**

(a-e) The attracting basin size ratio of three attractors for each single gene over-expression. (f-j) The steady state probability distribution of three attractors for each single gene over-expression. (k-n) The mean first passage time between three attractors for each single gene over-expression. (o-r) The basin

transition rates between three attractors for each single gene over-expression. States of cyclic attractor are grouped within one color block.

**Supplementary File. SBML-qual format of EMT Boolean model (sbml).**

**Supplementary Table S2. Data for the relative dynamic stability of EMT Boolean model with single mutation (xlsx).**

**Supplementary Table S3. 1-degree neighbor of wild type and mutated EMT network (xlsx).**
